# Supplementary material
Source: publisher figshare collection journal article supplement (https://acs.figshare.com/ndownloader/files/4547584)
Supplement: Supplementary file 1 [file 4547584]

# Polymerized Crystalline Colloidal Array Sensing of High Glucose Concentrations

## **Supporting Information**

*Michelle M. Ward Muscatello, Lee E. Stunja, and Sanford A. Asher\**

Department of Chemistry, University of Pittsburgh, Pittsburgh, Pennsylvania 15260

asher@pitt.edu

### **RECEIVED DATE**

Department of Chemistry, University of Pittsburgh, 219 Parkman Avenue, Pittsburgh, PA 15260, 412-624-8570 (phone), 412-624-0588 (fax)

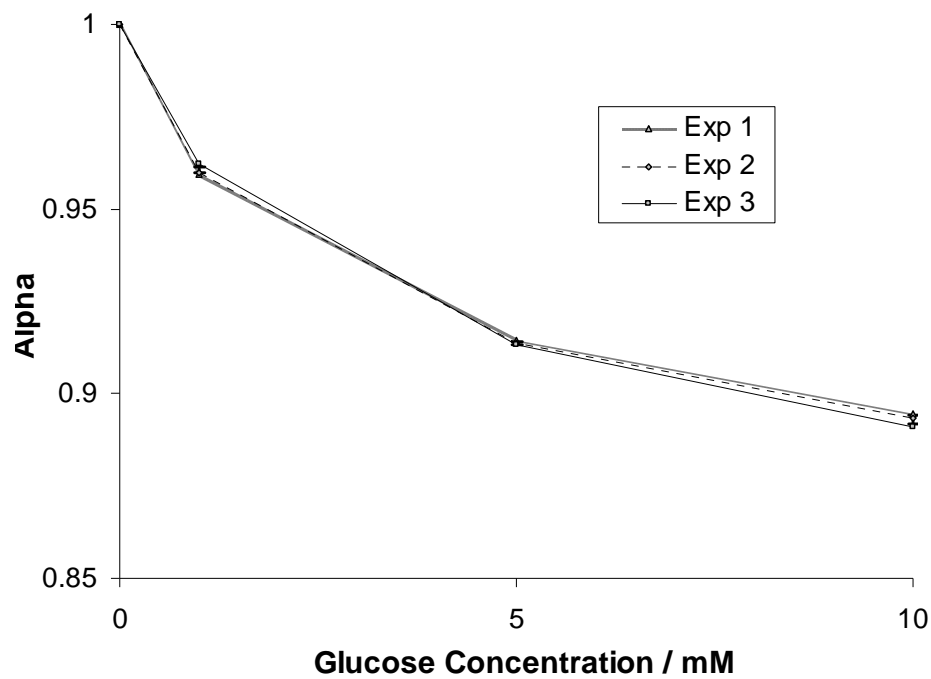

**Figure S-1.** IPCCA response dependence on cycling. The same piece of IPCCA was cycled through three glucose-sensing runs over the course of one week. The sensor response was characterized for 1 mM, 5 mM, and 10 mM glucose, then thoroughly washed with a phosphate buffered saline solution and tested again. The response of the IPCCA was fully reversible, with the greatest variation in diffraction response of  $\pm 1$  nm for the addition of 1 mM glucose, which is three times less than the variation in average diffraction wavelength response observed for three separate IPCCA exposed to 1 mM glucose. (Lines are added to aid the eye.)

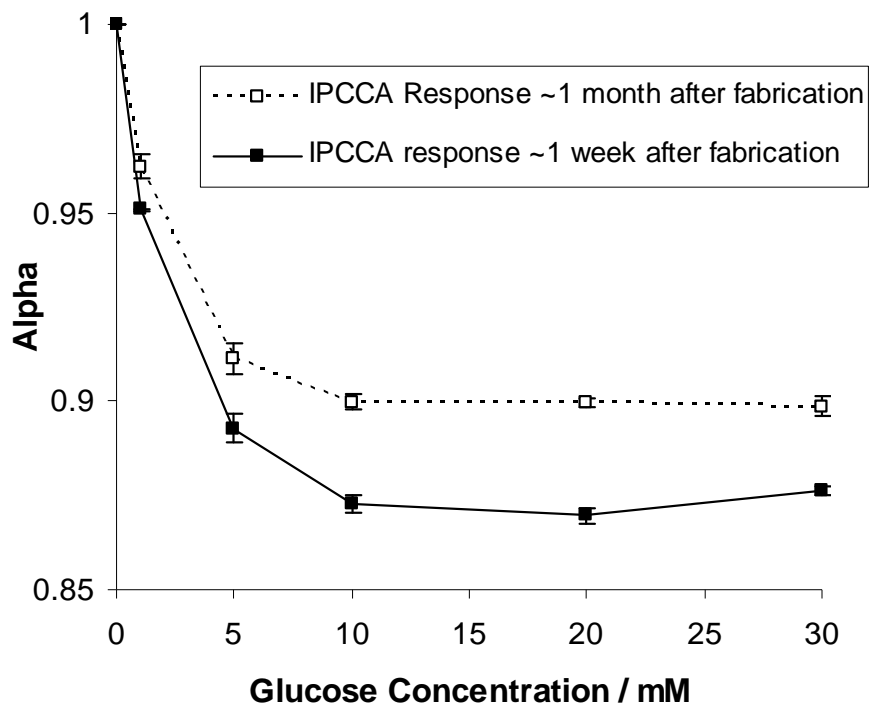

**Figure S-2.** IPCCA response dependence on aqueous storage time. After storage in aqueous buffer solution for 1 month, the average response of the IPCCA to 20 mM glucose is decreased by ~23%. (Lines are added to aid the eye.)
